# Supplementary material for: Women’s Participation in Collective Action for Workplace Gender Equality: The Role of Perceived Relative Deprivation, Resentment, and Moral Conviction
Source: Springer Nature journal article supplement (doi:10.1007/s11199-025-01573-7), 2025-03-22
Supplement: MOESM1 [file 11199_2025_1573_MOESM1_ESM.docx]

# Online supplement for Moscatelli, S., Mazzuca, S., Menegatti, M., & Rubini, M. (2025). Women’s Participation in Collective Action for Workplace Gender Equality:

# The Role of Perceived Relative Deprivation, Resentment, and Moral Conviction. *Sex Roles*. Silvia Moscatelli, University of Bologna. Email: [silvia.moscatelli@unibo.it](mailto:silvia.moscatelli@unibo.it)

Table S1 shows the factor loadings for the latent variables in the measurement model of Study 1.

Table S2 shows the standardized direct and indirect effects of a model without covariates (Study 1). The results are very similar to those described in the Results section.

Table S3 shows the standardized direct and indirect effects resulting from a multigroup comparison between the subsamples of non-working women (i.e., university students, housewives, or job-seekers; *n* = 123) and the working or retired women (*n* = 332; Study 1). The two models did not significantly differ, as reported in the Results section. Comparing the single associations one by one resulted in significant differences between the two subsamples with respect to a) the association between the measures of traditional collective action and small acts in the workplace and b) the association between political orientation and small acts in the workplace. The results remained similar to those of the main model, with the following exceptions: a) the direct link between relative deprivation and moral conviction became non-significant; 3) the indirect link between relative deprivation and traditional collective action through moral conviction became not significant; and c) the indirect link between relative deprivation and small acts in the workplace through moral conviction became not significant.

Table S4 shows the factor loadings for the latent variables in the measurement model of Study 2.

Table S5 shows the standardized direct and indirect effects of the SEM when all indicators were single items (Study 2). The results remained similar to those of the main model reported in the Results section.

Table S6 reports the standardized direct and indirect effects of the SEM without covariates (Study 2). The results remained similar to those of the main model reported in the Results section.

Table S7 shows the standardized direct and indirect effects of the model when the employment status (1 = non-worker, 2 = worker) was added as a covariate. Employment status had a significant negative relationship with small acts in the workplace. No other associations between employment status and the main model variables were significant. The pattern of direct and indirect effects remained unchanged, with the exception of the direct link between resentment and traditional collective action, which became non-significant (*p* = .067). Alignment with feminist values resulted positively associated with resentment and both collective action measures.

| **Table S1.** *Factor Loadings for the Latent Variables in the Measurement Model of Study 1* | | | | | |
| --- | --- | --- | --- | --- | --- |
| Items | Relative deprivation | Resentment | Moral conviction | Traditional CA | Small acts in the workplace |
| I feel deprived when I think about what we have as women compared to what men have in the workplace | .666 |  |  |  |  |
| When I compare what we have as women with what men have, I realize that we are quite worse off | .861 |  |  |  |  |
| Women earn less than men with the same qualifications | .779 |  |  |  |  |
| For us women finding a qualified job is much tougher than is for men | .809 |  |  |  |  |
| I feel dissatisfied comparing women’s and men’s situations at work | .728 |  |  |  |  |
| In general, women are unjustly disadvantaged compared to men in the workplace | .771 |  |  |  |  |
| Resentful |  | .574 |  |  |  |
| Rancorous |  | .870 |  |  |  |
| Outraged |  | .869 |  |  |  |
| To what extent is acting for gender equality based on strong moral principles? |  |  | .823 |  |  |
| To what extent is acting for gender equality an essential personal tenet? |  |  | .691 |  |  |
| To what extent is acting for gender equality a reflection of your core moral convictions? |  |  | .857 |  |  |
| Participating in public demonstrations or flash mobs |  |  |  | .725 |  |
| Signing a petition |  |  |  | .774 |  |
| Supporting associations that promote gender equality |  |  |  | .632 |  |
| Financially supporting initiatives |  |  |  | .708 |  |
| Following or showing support for persons or groups that promote gender equality on social media |  |  |  | .641 |  |
| Correcting others’ sexist language in the workplace |  |  |  |  | .673 |
| Intervening in the face of episodes of discrimination against women at work |  |  |  |  | .762 |
| Discussing the need to tackle gender inequality at work with colleagues |  |  |  |  | .850 |

*Note.* CA = Collective Action

| **Table S2.** *Standardized Direct and Indirect Effects of the SEM without Covariates (Study 1)* | | | | |
| --- | --- | --- | --- | --- |
|  | Resentment | Moral conviction | Traditional collective action | Small acts in the workplace |
|  | *ß* (SE)  [95% CI] | *ß* (SE)  [95% CI] | *ß* (SE)  [95% CI] | *ß* (SE)  [95% CI] |
| Direct effects |  |  |  |  |
| Relative deprivation | .236*** (.063)  [.113, .357] | .186*** (.052)  [.085, .291] | .285*** (.048)  [.188, .375] | .109 (.065)  [-.020, .233] |
| Resentment |  | .330*** (.054)  [.225, .433] | .016 (.052)  [-.086 .120] | .033 (.064)  [-.094, .156] |
| Moral conviction |  |  | .513*** (.055)  [.410, .621] | .525*** (.060)  [.410, .647] |
| Indirect effects |  |  |  |  |
| RD → Resentment → |  | .078** (.024)  [.039, .138] | .004 (.013)  [-.022, .029] | .008 (.016)  [-.022, .042] |
| Resentment → Moral conviction → |  |  | .169***(.034)  [.109, .244] | .173***(.036)  [.111, .251] |
| RD → Moral conviction → |  |  | .095*** (.027)  [.049, .156] | .097**(.029)  [.047, .162] |
| RD → Resentment →Moral conviction → |  |  | .040** (.014)  [.019, .075] | .041**(.014)  [.019, .078] |

*Note*. ****p* < .001, ***p* < .01, **p* < .05.

| **Table S3.** *Standardized Direct and Indirect Effects in the Samples of Not-Working (n = 123) and Working (or Retired) Women (n = 332; Study 1)* | | | | | | | | | | |
| --- | --- | --- | --- | --- | --- | --- | --- | --- | --- | --- |
|  | Non-workers | | | | | Workers | | | | |
|  | RD | Resentment | MC | Traditional CA | Small acts in the workplace | RD | Resentment | MC | Traditional CA | Small acts |
|  | *ß* (SE) | *ß* (SE) | *ß* (SE) | *ß* (SE) | *ß* (SE) | *ß* (SE) | *ß* (SE) | *ß* (SE) | *ß* (SE) | *ß* (SE) |
| Direct effects |  |  |  |  |  |  |  |  |  |  |
| RD |  | .214* (.102) | .248* (.103) | .147*** (.099) | .101 (.107) |  | .218*** (.061) | .099 (.059) | .263*** (.053) | .076 (.057) |
| Resentment |  |  | .201* (.102) | .033 (.097) | -.031 (.104) |  |  | .356*** (.056) | .029 (.059) | .063 (.062) |
| MC |  |  |  | .559*** (.094) | .613*** (.099) |  |  |  | .418** (.058) | .445*** (.060) |
| Indirect effects |  |  |  |  |  |  |  |  |  |  |
| RD →  Resentment→ |  |  | .043 (.030) | .007 (.021) | -.007 (.022) |  |  | .078** (.025) | .006 (.013) | .014 (.014) |
| Resentment → MC→ |  |  |  | .112 (.061) | .123 (.067) |  |  |  | .149*** (.033) | .159*** (.034) |
| RD → MC → |  |  |  | .138* (.063) | .152* (.069) |  |  |  | .042 (.025) | .044 (.027) |
| RD → Resentment →MC → |  |  |  | .043 (.030) | .026 (.019) |  |  |  | .032 (.012) | .035 (.012) |
| Covariates |  |  |  |  |  |  |  |  |  |  |
| Political orientation | -.282** (.092) | -.091 (.101) | -.086 (.101) | -.215** (.090) | .057 (.098) | -.187** (.056) | -.034 (.059) | -.198***(.054) | -.249***(.050) | -.211***(.053) |
| Age | -.047 (.096) | .055 (.100) | .119 (.096) | -.078 (.087) | -.101 (.095) | .016 (.057) | -.071 (.058) | .039 (.054) | -.013 (.049) | -.102* (.051) |

*Note*. RD = relative deprivation. MC = moral conviction. CA = collective action. ****p* < .001, ***p* < .01, **p* < .05.

| **Table S4.** *Factor Loadings for the Latent Variables in the Measurement Model of Study 2* | | | | |
| --- | --- | --- | --- | --- |
| Items | Resentment | Moral conviction | Traditional CA | Small acts in the workplace |
| Resentful | .907 |  |  |  |
| Rancorous | .616 |  |  |  |
| Outraged | .814 |  |  |  |
| To what extent is acting for gender equality based on strong moral principles? |  | .769 |  |  |
| To what extent is acting for gender equality an essential personal tenet? |  | .800 |  |  |
| To what extent is acting for gender equality a reflection of your core moral convictions? |  | .889 |  |  |
| Participating in public demonstrations or flash mobs |  |  | .780 |  |
| Signing a petition |  |  | .800 |  |
| Supporting associations that promote gender equality |  |  | .553 |  |
| Financially supporting initiatives |  |  | .644 |  |
| Following or showing support for persons or groups that promote gender equality on social media |  |  | .511 |  |
| Correcting others’ sexist language in the workplace |  |  |  | .516 |
| Intervening in the face of episodes of discrimination against women at work |  |  |  | .803 |
| Discussing the need to tackle gender inequality at work with colleagues |  |  |  | .878 |

| **Table S5.** *Standardized Direct and Indirect Effects of the SEM When All Indicators Were Single Items (Study 2)* | | | | |
| --- | --- | --- | --- | --- |
|  | Resentment | Moral conviction | Traditional collective action | Small acts in the workplace |
|  | *ß* (SE) [95% CI] | *ß* (SE) [95% CI] | *ß* (SE) [95% CI] | *ß* (SE) [95% CI] |
| Direct effects |  |  |  |  |
| Relative Deprivation | .440***(.048)  [.345, .534] | .043 (.068)  [-.094, .172] | .049 (.064)  [-.081, .171] | .037 (.065)  [-.095, .161] |
| Resentment |  | .201*(.078)  [.046, .349] | .207*(.081)  [.052 .368] | -.029 (.072)  [-.162, .119] |
| Moral conviction |  |  | .472***(.059)  [.351, .588] | .548***(.067)  [.410, .674] |
| Indirect effects |  |  |  |  |
| RD → Resentment → |  | .089* (.036)  [.024, .163] | .091* (.036)  [.027, .161] | -.013 (.032)  [-.074, .051] |
| Resentment →Moral conviction → |  |  | .095*(.039)  [.025, .179] | .110*(.046)  [.026, .210] |
| RD → Moral conviction → |  |  | .020 (.032)  [-.043, .084] | .024 (.038)  [-.051, .098] |
| RD → Resentment → Moral conviction → |  |  | .042*(.018)  [.012, .084] | .049* (.021)  [.014, .089] |
| Covariates |  |  |  |  |
| Political orientation | -.020 (.052)  [-.127, .78] | -.210***(.056)  [-.324, -.105] | -.229***(.054)  [-.330, -.123] | .002 (.057)  [-.116, .111] |
| Alignment with feminist values | -.292***(.058)  [-.406, -.180] | -.015 (.068)  [-.157, .109] | .081 (.046)  [-.016, .165] | -.089 (.046)  [-.178, .004] |

*Note*. ****p* < .001, ***p* < .01, **p* < .05.

| ***Table S6.*** *Standardized Direct and Indirect Effects of the SEM without Covariates (Study 2)* | | | | |
| --- | --- | --- | --- | --- |
|  | Resentment | Moral conviction | Traditional collective action | Small acts in the workplace |
|  | *ß* (SE) [95% CI] | *ß* (SE) [95% CI] | *ß* (SE) [95% CI] | *ß* (SE) [95% CI] |
| Direct effects |  |  |  |  |
| Relative deprivation | .485***(.046)  [.387, .568] | .057 (.068)  [-.080, .186] | .070 (.066)  [-.063, .192] | .039 (.065)  [-.093, .161] |
| Resentment |  | .223**(.072)  [.080, .367] | .179*(.082)  [.022 .343] | .001 (.070)  [-.130, .143] |
| Moral conviction |  |  | .524***(.060)  [.405, .641] | .552***(.064)  [.419, .673] |
| Indirect effects |  |  |  |  |
| RD → Resentment → |  | .108**(.037)  [.040, .184] | .087*(.041)  [.013, .172] | .001 (.034)  [-.065, .071] |
| Resentment →Moral conviction → |  |  | .117**(.041)  [.042, .206] | .123**(.044)  [.046, .221] |
| RD → Moral conviction → |  |  | .030 (.036)  [-.041, .100] | .031 (.038)  [-.043, .106] |
| RD → Resentment → Moral conviction → |  |  | .057**(.021)  [.022, .104] | .060**(.022)  [.023, .112] |

*Note.* ****p* < .001, ***p* < .01, **p* < .05.

| **Table S7.** *Standardized Direct and Indirect Effects of the Main Model When Occupational Status Is Added as a Covariate (Study 2)* | | | | |
| --- | --- | --- | --- | --- |
|  | Resentment | Moral conviction | Traditional collective action | Small acts in the workplace |
|  | *ß* (SE) [95% CI] | *ß* (SE) [95% CI] | *ß* (SE) [95% CI] | *ß* (SE) [95% CI] |
| Direct effects |  |  |  |  |
| Relative Deprivation | .474***(.046)  [.377, .560] | .059 (.065)  [-.070, .184] | .075 (.064)  [-.082, .145] | .053 (.064)  [-.077, .176] |
| Resentment |  | .147*(.068)  [.014, .280] | .146 (.078)  [-.005 .300] | -.034 (.072)  [-.168, .113] |
| Moral conviction |  |  | .410***(.070)  [.269, .549] | .472***(.071)  [.331, .609] |
| Indirect effects |  |  |  |  |
| RD → Resentment → |  | .070* (.033)  [.008, .139] | .069 (.038)  [.000, .149] | -.016 (.034)  [-.081, .053] |
| Resentment →Moral conviction → |  |  | .060* (.030)  [.011, .129] | .069* (.034)  [.011, .146] |
| RD → Moral conviction → |  |  | .024 (.028)  [-.025, .083] | .028 (.032)  [-.032, .093] |
| RD → Resentment → Moral conviction → |  |  | .029* (.015)  [.005, .065] | .033*(.017)  [.006, .072] |
| Covariates |  |  |  |  |
| Political orientation | -.007 (.055)  [-.119, .098] | -.142**(.058)  [-.263, -.034] | -.176**(.057)  [-.288, -.068] | .030 (.055)  [-.080, .135] |
| Alignment with feminist values | .167***(.065)  [.036, .294] | .303***(.066)  [.174, .427] | .235***(.065)  [.113, .370] | .217***(.063)  [.079, .363] |
| Occupational status (non-worker; worker) | .001 (.056)  [-110, .110] | -.066 (.054)  [-.167, .043] | .031 (.058)  [-.082, .145] | -.107* (.050)  [-.201, -.008] |
